# Supplementary material for: Improving the Efficiency of New Automatic Dishwashing Detergent Formulation by Addition of Thermostable Lipase, Protease and Amylase
Source: PubMed Central journal article supplement (PMC6151835; doi:10.3390/molecules22091577), 2017-09-19
Supplement: molecules-22-01577-s001.pdf [file molecules-22-01577-s001.pdf]

## Supplementary information

*Article*

# Improving the efficiency of new automatic dishwashing detergent formulation by addition of thermostable lipase, protease and amylase

Ashwini Naganthran<sup>1,2</sup>, Malihe Masomian<sup>1,2</sup>, Mohd Shukuri Mohamad Ali<sup>1,3</sup>, Hisham Mohd Nooh<sup>1,4</sup> and Raja Noor Zaliha Raja Abd. Rahman<sup>1,2</sup>

<sup>1</sup> Enzyme and Microbial Technology Research Center, Universiti Putra Malaysia, Serdang, Selangor, 43400, Malaysia

<sup>2</sup> Department of Microbiology, Faculty of Biotechnology and Biomolecular Science, Universiti Putra Malaysia, Serdang, Selangor, 43400, Malaysia

<sup>3</sup> Department of Biochemistry, Faculty of Biotechnology and Biomolecular Science, Universiti Putra Malaysia, Serdang, Selangor, 43400, Malaysia

<sup>4</sup> Laboratory of Molecular Biomedicine, Institute of Bioscience, Universiti Putra Malaysia, Serdang, Selangor, 43400, Malaysia

\* Correspondence: [rnzaliha@upm.edu.my](mailto:rnzaliha@upm.edu.my) (R.N.Z.R.A. Rahman); Tel.: +60 3 8947 1416

Academic Editor: name

**Table S1: Statistical analysis of one-way ANOVA and Post Hoc test on efficiency of formulated detergent.**

**One- way ANOVA for data on Figure 1A**

**ANOVA**

|                   |                |               |           | Sum of Squares | df | Mean Square | F        | Sig. |
|-------------------|----------------|---------------|-----------|----------------|----|-------------|----------|------|
| Without detergent | Between Groups | (Combined)    |           | 1128.047       | 3  | 376.016     | 99.227   | .000 |
|                   |                | Linear Term   | Contrast  | 983.733        | 1  | 983.733     | 259.598  | .000 |
|                   |                |               | Deviation | 144.314        | 2  | 72.157      | 19.042   | .009 |
|                   |                | Within Groups |           | 15.158         | 4  | 3.789       |          |      |
|                   | Total          |               | 1143.205  | 7              |    |             |          |      |
| With detergent    | Between Groups | (Combined)    |           | 8090.910       | 3  | 2696.970    | 3739.559 | .000 |
|                   |                | Linear Term   | Contrast  | 6204.158       | 1  | 6204.158    | 8602.549 | .000 |
|                   |                |               | Deviation | 1886.752       | 2  | 943.376     | 1308.064 | .000 |
|                   |                | Within Groups |           | 2.885          | 4  | .721        |          |      |
|                   | Total          |               | 8093.795  | 7              |    |             |          |      |

**Post Hoc test for Figure 1A**

**Without detergent**

Tukey HSD

| temperature | N | Subset for alpha = 0.05 |         |
|-------------|---|-------------------------|---------|
|             |   | 1                       | 2       |
| 21          | 2 | 6.0000                  |         |
| 40          | 2 |                         | 30.5200 |
| 50          | 2 |                         | 33.4000 |
| 60          | 2 |                         | 35.4500 |
| Sig.        |   | 1.000                   | .193    |

Means for groups in homogeneous subsets are displayed.

a. Uses Harmonic Mean Sample Size = 2.000.

**With detergent**

Tukey HSD

| temperature | N | Subset for alpha = 0.05 |         |
|-------------|---|-------------------------|---------|
|             |   | 1                       | 2       |
| 21          | 2 | 10.0600                 |         |
| 40          | 2 |                         | 83.2000 |
| 50          | 2 |                         | 83.3000 |
| 60          | 2 |                         | 84.0000 |
| Sig.        |   | 1.000                   | .787    |

Means for groups in homogeneous subsets are displayed.

a. Uses Harmonic Mean Sample Size = 2.000.

**One-way ANOVA for data on Figure 1B**

**ANOVA**

|                   |                 |             |           | Sum of Squares | df    | Mean Square | F        | Sig. |
|-------------------|-----------------|-------------|-----------|----------------|-------|-------------|----------|------|
| Without detergent | Betw een Groups | (Combined)  |           | 64.564         | 3     | 21.521      | 344.340  | .000 |
|                   |                 | Linear Term | Contrast  | 63.621         | 1     | 63.621      | 1017.936 | .000 |
|                   |                 |             | Deviation | .943           | 2     | .471        | 7.542    | .044 |
|                   | Within Groups   |             | .250      | 4              | .063  |             |          |      |
|                   | Total           |             | 64.814    | 7              |       |             |          |      |
| With detergent    | Betw een Groups | (Combined)  |           | 515.638        | 3     | 171.879     | 85.321   | .000 |
|                   |                 | Linear Term | Contrast  | 474.656        | 1     | 474.656     | 235.620  | .000 |
|                   |                 |             | Deviation | 40.982         | 2     | 20.491      | 10.172   | .027 |
|                   | Within Groups   |             | 8.058     | 4              | 2.015 |             |          |      |
|                   | Total           |             | 523.696   | 7              |       |             |          |      |

**Post Hoc test for Figure 1B**

**Without detergent**

Tukey HSD

| temperature | N | Subset for alpha = 0.05 |        |        |        |
|-------------|---|-------------------------|--------|--------|--------|
|             |   | 1                       | 2      | 3      | 4      |
| 21.00       | 2 | 2.0000                  |        |        |        |
| 40.00       | 2 |                         | 5.6000 |        |        |
| 50.00       | 2 |                         |        | 8.3000 |        |
| 60.00       | 2 |                         |        |        | 9.3500 |
| Sig.        |   | 1.000                   | 1.000  | 1.000  | 1.000  |

Means for groups in homogeneous subsets are displayed.

a. Uses Harmonic Mean Sample Size = 2.000.

**With detergent**

Tukey HSD

| temperature | N | Subset for alpha = 0.05 |         |
|-------------|---|-------------------------|---------|
|             |   | 1                       | 2       |
| 21.00       | 2 | 3.0000                  |         |
| 40.00       | 2 |                         | 18.7900 |
| 50.00       | 2 |                         | 20.1500 |
| 60.00       | 2 |                         | 24.0500 |
| Sig.        |   | 1.000                   | .067    |

Means for groups in homogeneous subsets are displayed.

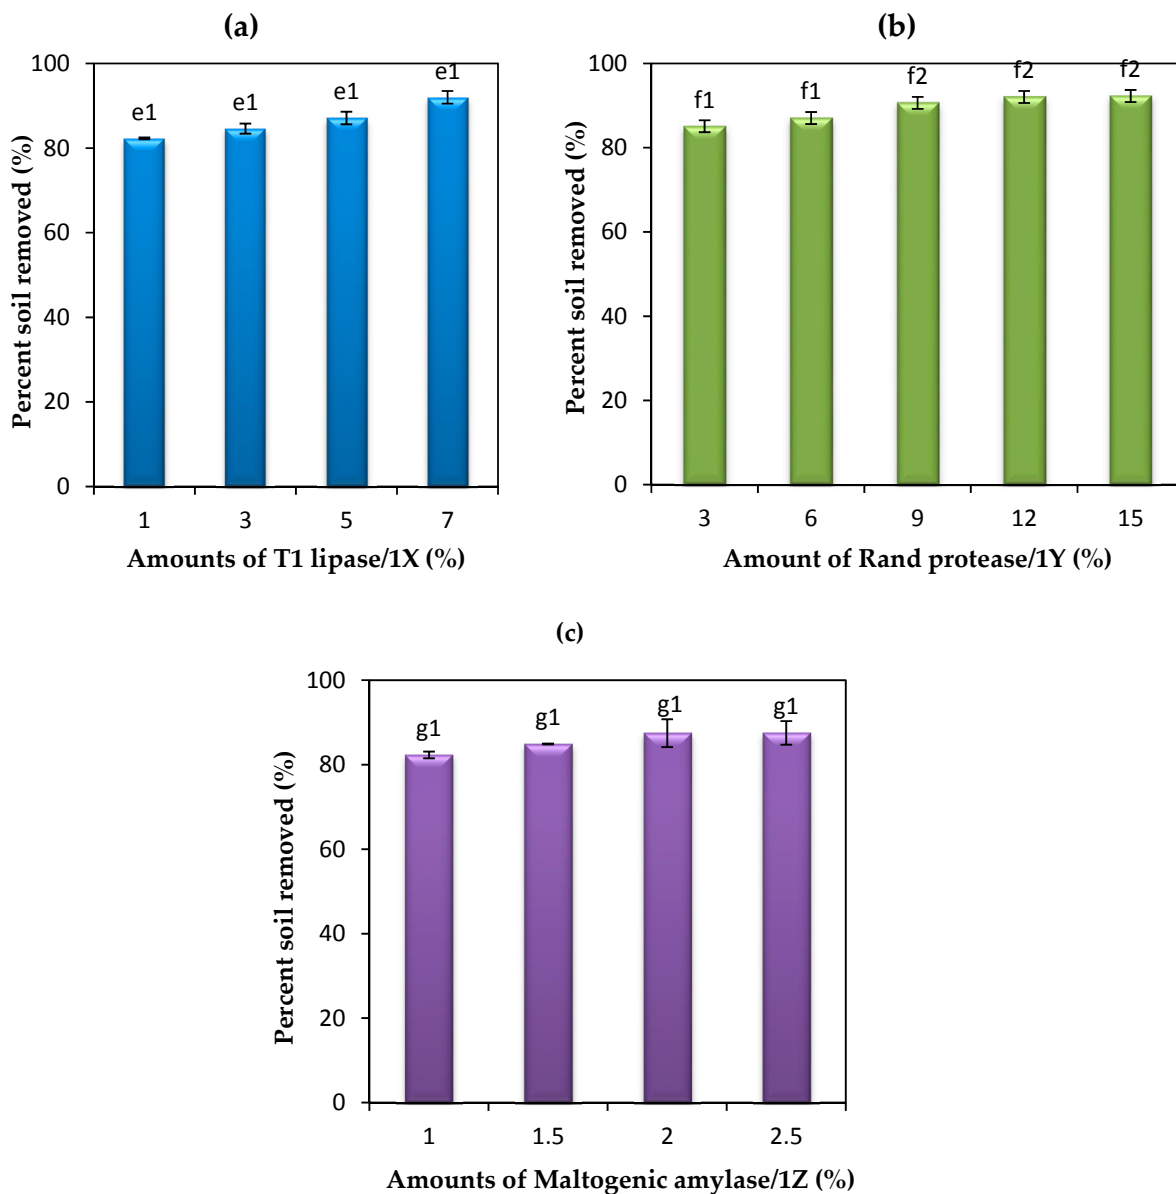

**Figure S1.** Detergent performance profiles using all 3 enzymes (lipase, protease and amylase). The dishwashing test was carried out in soft water (0 ppm CaCO<sub>3</sub>) at 60°C. The detergent was contained 7 % surfactant, 3 % builders, 5 % dispersing agent in glycine-carbonate (pH 9.25) buffer and the selected amount of enzymes. The (a) T1 lipase, (b) Rand protease and (c) Maltogenic amylase concentration were multiple of 1X, 1Y and 1Z, respectively.

**Note:** Superscript f2 indicated groups that showed a significant difference between the groups when different enzyme concentration was added. All superscripts were obtained using post-hoc tests as shown in Table S2. Data are means ± standard deviation of three determinations and indicated as error bars.

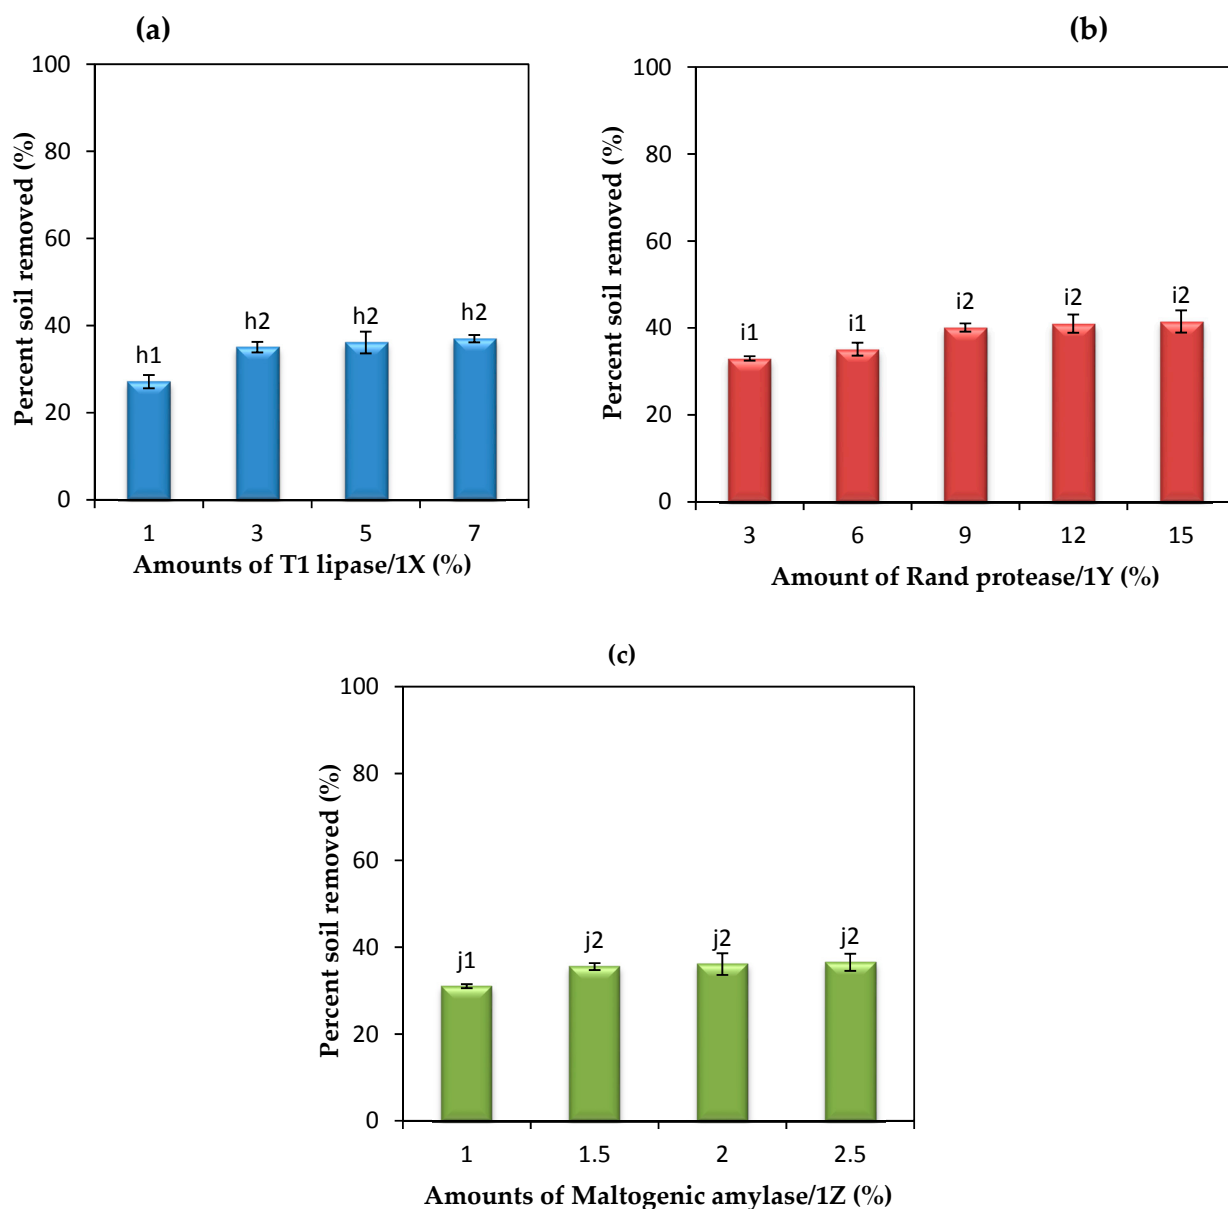

**Figure S2.** Detergent performance profiles using all 3 enzymes (lipase, protease and amylase). The dishwashing test was carried out in hard water (350 ppm  $\text{CaCO}_3$ ) at 60°C. The detergent was contained 7 % surfactant, 3 % builders, 5 % dispersing agent in glycine-carbonate (pH 9.25) buffer and the selected amount of enzymes. The (a) T1 lipase, (b) Rand protease and (c) Maltogenic amylase concentration were multiple of 1X, 1Y and 1Z, respectively.

**Note:** Superscript h2, i2 and j2 indicated groups that showed a significant difference between the groups when different enzyme concentrations were added. All superscripts were obtained using post-hoc tests as shown in Table S3. Data are means  $\pm$  standard deviation of three determinations and indicate as error bars.

**Table S2: Statistical analysis of one-way ANOVA and Post Hoc test on detergent performance profiles using all 3 enzymes (lipase, protease and amylase) in soft water.**

**One- way ANOVA for data on Figure S1A**

**ANOVA**

Soil removal (T1 lipase addition)

|                | Sum of Squares | df | Mean Square | F     | Sig. |
|----------------|----------------|----|-------------|-------|------|
| Between Groups | 103.161        | 3  | 34.387      | 3.926 | .110 |
| Within Groups  | 35.036         | 4  | 8.759       |       |      |
| Total          | 138.197        | 7  |             |       |      |

**Post Hoc Tests for Figure S1A**

**Multiple Comparisons**

Dependent Variable:

Tukey HSD

| (I) percentage | (J) percentage | Mean Difference (I-J) | Std. Error | Sig. | 95% Confidence Interval |             |
|----------------|----------------|-----------------------|------------|------|-------------------------|-------------|
|                |                |                       |            |      | Lower Bound             | Upper Bound |
| 1.00           | 3.00           | -2.26665              | 2.95954    | .866 | -14.3145                | 9.7812      |
|                | 5.00           | -4.76665              | 2.95954    | .465 | -16.8145                | 7.2812      |
|                | 7.00           | -9.66665              | 2.95954    | .098 | -21.7145                | 2.3812      |
| 3.00           | .00            | 2.26665               | 2.95954    | .866 | -9.7812                 | 14.3145     |
|                | 5.00           | -2.50000              | 2.95954    | .832 | -14.5479                | 9.5479      |
|                | 7.00           | -7.40000              | 2.95954    | .199 | -19.4479                | 4.6479      |
| 5.00           | .00            | 4.76665               | 2.95954    | .465 | -7.2812                 | 16.8145     |
|                | 3.00           | 2.50000               | 2.95954    | .832 | -9.5479                 | 14.5479     |
|                | 7.00           | -4.90000              | 2.95954    | .446 | -16.9479                | 7.1479      |
| 7.00           | .00            | 9.66665               | 2.95954    | .098 | -2.3812                 | 21.7145     |
|                | 3.00           | 7.40000               | 2.95954    | .199 | -4.6479                 | 19.4479     |
|                | 5.00           | 4.90000               | 2.95954    | .446 | -7.1479                 | 16.9479     |

**One-way ANOVA for data on Figure S1B**  
ANOVA

Soil removal ( Rand protease addition)

|                | Sum of Squares | df | Mean Square | F     | Sig. |
|----------------|----------------|----|-------------|-------|------|
| Between Groups | 172.248        | 5  | 34.450      | 8.005 | .012 |
| Within Groups  | 25.820         | 6  | 4.303       |       |      |
| Total          | 198.068        | 11 |             |       |      |

**Post Hoc Tests for Figure S1B**

**Multiple Comparisons**

Dependent Variable: soil  
Tukey HSD

| (I) percentage | (J) percentage | Mean Difference (I-J) | Std. Error | Sig.  | 95% Confidence Interval |             |
|----------------|----------------|-----------------------|------------|-------|-------------------------|-------------|
|                |                |                       |            |       | Lower Bound             | Upper Bound |
| 3.00           | .00            | 2.74667               | 2.07444    | .766  | -5.5093                 | 11.0026     |
|                | 6.00           | -.92000               | 2.07444    | .997  | -9.1759                 | 7.3359      |
|                | 9.00           | -5.55500              | 2.07444    | .210  | -13.8109                | 2.7009      |
|                | 12.00          | -6.95333              | 2.07444    | .099  | -15.2093                | 1.3026      |
|                | 15.00          | -7.19750              | 2.07444    | .087  | -15.4534                | 1.0584      |
| 6.00           | .00            | 3.66667               | 2.07444    | .542  | -4.5893                 | 11.9226     |
|                | 3.00           | .92000                | 2.07444    | .997  | -7.3359                 | 9.1759      |
|                | 9.00           | -4.63500              | 2.07444    | .341  | -12.8909                | 3.6209      |
|                | 12.00          | -6.03333              | 2.07444    | .162  | -14.2893                | 2.2226      |
|                | 15.00          | -6.27750              | 2.07444    | .142  | -14.5334                | 1.9784      |
| 9.00           | .00            | 8.30167*              | 2.07444    | .049  | .0457                   | 16.5576     |
|                | 3.00           | 5.55500               | 2.07444    | .210  | -2.7009                 | 13.8109     |
|                | 6.00           | 4.63500               | 2.07444    | .341  | -3.6209                 | 12.8909     |
|                | 12.00          | -1.39833              | 2.07444    | .979  | -9.6543                 | 6.8576      |
|                | 15.00          | -1.64250              | 2.07444    | .959  | -9.8984                 | 6.6134      |
| 12.00          | .00            | 9.70000*              | 2.07444    | .025  | 1.4441                  | 17.9559     |
|                | 3.00           | 6.95333               | 2.07444    | .099  | -1.3026                 | 15.2093     |
|                | 6.00           | 6.03333               | 2.07444    | .162  | -2.2226                 | 14.2893     |
|                | 9.00           | 1.39833               | 2.07444    | .979  | -6.8576                 | 9.6543      |
|                | 15.00          | -.24417               | 2.07444    | 1.000 | -8.5001                 | 8.0118      |
| 15.00          | .00            | 9.94417*              | 2.07444    | .022  | 1.6882                  | 18.2001     |
|                | 3.00           | 7.19750               | 2.07444    | .087  | -1.0584                 | 15.4534     |
|                | 6.00           | 6.27750               | 2.07444    | .142  | -1.9784                 | 14.5334     |
|                | 9.00           | 1.64250               | 2.07444    | .959  | -6.6134                 | 9.8984      |
|                | 12.00          | .24417                | 2.07444    | 1.000 | -8.0118                 | 8.5001      |

\*. The mean difference is significant at the 0.05 level.

## One- way ANOVA for data on Figure S1C

### ANOVA

Soil removal ( maltogenic amylase addition)

|                | Sum of Squares | df | Mean Square | F     | Sig. |
|----------------|----------------|----|-------------|-------|------|
| Between Groups | 36.523         | 3  | 12.174      | 1.414 | .362 |
| Within Groups  | 34.429         | 4  | 8.607       |       |      |
| Total          | 70.951         | 7  |             |       |      |

## Post Hoc Tests for Figure S1C

### Multiple Comparisons

Tukey HSD

| (I) percentage | (J) percentage | Mean Difference (I-J) | Std. Error | Sig.  | 95% Confidence Interval |             |
|----------------|----------------|-----------------------|------------|-------|-------------------------|-------------|
|                |                |                       |            |       | Lower Bound             | Upper Bound |
| 1.00           | 1.50           | -2.57915              | 2.93381    | .816  | -14.5223                | 9.3640      |
|                | 2.00           | -5.14165              | 2.93381    | .407  | -17.0848                | 6.8015      |
|                | 2.50           | -5.16665              | 2.93381    | .404  | -17.1098                | 6.7765      |
| 1.50           | .00            | 2.57915               | 2.93381    | .816  | -9.3640                 | 14.5223     |
|                | 2.00           | -2.56250              | 2.93381    | .819  | -14.5056                | 9.3806      |
|                | 2.50           | -2.58750              | 2.93381    | .815  | -14.5306                | 9.3556      |
| 2.00           | .00            | 5.14165               | 2.93381    | .407  | -6.8015                 | 17.0848     |
|                | 1.50           | 2.56250               | 2.93381    | .819  | -9.3806                 | 14.5056     |
|                | 2.50           | -.02500               | 2.93381    | 1.000 | -11.9681                | 11.9181     |
| 2.50           | .00            | 5.16665               | 2.93381    | .404  | -6.7765                 | 17.1098     |
|                | 1.50           | 2.58750               | 2.93381    | .815  | -9.3556                 | 14.5306     |
|                | 2.00           | .02500                | 2.93381    | 1.000 | -11.9181                | 11.9681     |



**Table S3: Statistical analysis of one-way ANOVA and Post Hoc test on detergent performance profiles using all 3 enzymes (lipase, protease and amylase) in hard water.**

**One- way ANOVA for data on Figure S2A**  
ANOVA

removal

|                | Sum of Squares | df | Mean Square | F      | Sig. |
|----------------|----------------|----|-------------|--------|------|
| Between Groups | 183.849        | 3  | 61.283      | 22.846 | .000 |
| Within Groups  | 21.460         | 8  | 2.682       |        |      |
| Total          | 205.309        | 11 |             |        |      |

**Post Hoc Tests for Figure S2A**

**Multiple Comparisons**

Dependent Variable: removal

Tukey HSD

| (I) amount | (J) amount | Mean Difference (I-J) | Std. Error | Sig. | 95% Confidence Interval |             |
|------------|------------|-----------------------|------------|------|-------------------------|-------------|
|            |            |                       |            |      | Lower Bound             | Upper Bound |
| 1.00       | 3.00       | -7.90000000*          | 1.33728581 | .002 | -12.1824599             | -3.6175401  |
|            | 5.00       | -8.96666667*          | 1.33728581 | .001 | -13.2491266             | -4.6842068  |
|            | 7.00       | -9.83333333*          | 1.33728581 | .000 | -14.1157932             | -5.5508734  |
| 3.00       | 1.00       | 7.90000000*           | 1.33728581 | .002 | 3.6175401               | 12.1824599  |
|            | 5.00       | -1.06666667           | 1.33728581 | .854 | -5.3491266              | 3.2157932   |
|            | 7.00       | -1.93333333           | 1.33728581 | .508 | -6.2157932              | 2.3491266   |
| 5.00       | 1.00       | 8.96666667*           | 1.33728581 | .001 | 4.6842068               | 13.2491266  |
|            | 3.00       | 1.06666667            | 1.33728581 | .854 | -3.2157932              | 5.3491266   |
|            | 7.00       | -.86666667            | 1.33728581 | .913 | -5.1491266              | 3.4157932   |
| 7.00       | 1.00       | 9.83333333*           | 1.33728581 | .000 | 5.5508734               | 14.1157932  |
|            | 3.00       | 1.93333333            | 1.33728581 | .508 | -2.3491266              | 6.2157932   |
|            | 5.00       | .86666667             | 1.33728581 | .913 | -3.4157932              | 5.1491266   |

\*. The mean difference is significant at the 0.05 level.

## Homogeneous Subsets

removal

Tukey HSD

| amount | N | Subset for alpha = 0.05 |            |
|--------|---|-------------------------|------------|
|        |   | 1                       | 2          |
| 1.00   | 3 | 27.1333333              |            |
| 3.00   | 3 |                         | 35.0333333 |
| 5.00   | 3 |                         | 36.1000000 |
| 7.00   | 3 |                         | 36.9666667 |
| Sig.   |   | 1.000                   | .508       |

Means for groups in homogeneous subsets are displayed.

a. Uses Harmonic Mean Sample Size = 3.000.

**One- way ANOVA for data on Figure S2B**  
ANOVA

removal

|                | Sum of Squares | df | Mean Square | F      | Sig. |
|----------------|----------------|----|-------------|--------|------|
| Between Groups | 183.849        | 3  | 61.283      | 22.846 | .000 |
| Within Groups  | 21.460         | 8  | 2.682       |        |      |
| Total          | 205.309        | 11 |             |        |      |

**Post Hoc Tests for Figure S2B**

**Multiple Comparisons**

Dependent Variable: removal

Tukey HSD

| (I) amount | (J) amount | Mean Difference (I-J) | Std. Error | Sig. | 95% Confidence Interval |             |
|------------|------------|-----------------------|------------|------|-------------------------|-------------|
|            |            |                       |            |      | Lower Bound             | Upper Bound |
|            | 3.00       | -7.9000000*           | 1.33728581 | .002 | -12.1824599             | -3.6175401  |
| 1.00       | 5.00       | -8.9666667*           | 1.33728581 | .001 | -13.2491266             | -4.6842068  |
|            | 7.00       | -9.8333333*           | 1.33728581 | .000 | -14.1157932             | -5.5508734  |
|            | 1.00       | 7.9000000*            | 1.33728581 | .002 | 3.6175401               | 12.1824599  |
| 3.00       | 5.00       | -1.0666667            | 1.33728581 | .854 | -5.3491266              | 3.2157932   |
|            | 7.00       | -1.9333333            | 1.33728581 | .508 | -6.2157932              | 2.3491266   |
|            | 1.00       | 8.9666667*            | 1.33728581 | .001 | 4.6842068               | 13.2491266  |
| 5.00       | 3.00       | 1.0666667             | 1.33728581 | .854 | -3.2157932              | 5.3491266   |
|            | 7.00       | -.8666667             | 1.33728581 | .913 | -5.1491266              | 3.4157932   |
|            | 1.00       | 9.8333333*            | 1.33728581 | .000 | 5.5508734               | 14.1157932  |
| 7.00       | 3.00       | 1.9333333             | 1.33728581 | .508 | -2.3491266              | 6.2157932   |
|            | 5.00       | .8666667              | 1.33728581 | .913 | -3.4157932              | 5.1491266   |

\*. The mean difference is significant at the 0.05 level.

## Homogeneous Subsets

removal

Tukey HSD

| amount | N | Subset for alpha = 0.05 |            |
|--------|---|-------------------------|------------|
|        |   | 1                       | 2          |
| 1.00   | 3 | 27.1333333              |            |
| 3.00   | 3 |                         | 35.0333333 |
| 5.00   | 3 |                         | 36.1000000 |
| 7.00   | 3 |                         | 36.9666667 |
| Sig.   |   | 1.000                   | .508       |

Means for groups in homogeneous subsets are displayed.

a. Uses Harmonic Mean Sample Size = 3.000.

**One- way ANOVA for data on Figure S2C**

**ANOVA**

removal

|                | Sum of Squares | df | Mean Square | F     | Sig. |
|----------------|----------------|----|-------------|-------|------|
| Between Groups | 57.772         | 3  | 19.257      | 7.135 | .012 |
| Within Groups  | 21.593         | 8  | 2.699       |       |      |
| Total          | 79.365         | 11 |             |       |      |

**Post Hoc Tests for Figure S2C**

**Multiple Comparisons**

Dependent Variable: removal

Tukey HSD

| (I) amount | (J) amount | Mean Difference (I-J) | Std. Error | Sig. | 95% Confidence Interval |             |
|------------|------------|-----------------------|------------|------|-------------------------|-------------|
|            |            |                       |            |      | Lower Bound             | Upper Bound |
| 1          | 1.50000    | -4.5000000*           | 1.34142544 | .040 | -8.7957165              | -.2042835   |
|            | 2.00000    | -5.0700000*           | 1.34142544 | .022 | -9.3657165              | -.7742835   |
|            | 2.50000    | -5.4500000*           | 1.34142544 | .015 | -9.7457165              | -1.1542835  |
| 1.50000    | 1          | 4.5000000*            | 1.34142544 | .040 | .2042835                | 8.7957165   |
|            | 2.00000    | -.57000000            | 1.34142544 | .973 | -4.8657165              | 3.7257165   |
|            | 2.50000    | -.95000000            | 1.34142544 | .891 | -5.2457165              | 3.3457165   |
| 2.00000    | 1          | 5.0700000*            | 1.34142544 | .022 | .7742835                | 9.3657165   |
|            | 1.50000    | .57000000             | 1.34142544 | .973 | -3.7257165              | 4.8657165   |
|            | 2.50000    | -.38000000            | 1.34142544 | .991 | -4.6757165              | 3.9157165   |
| 2.50000    | 1          | 5.4500000*            | 1.34142544 | .015 | 1.1542835               | 9.7457165   |
|            | 1.50000    | .95000000             | 1.34142544 | .891 | -3.3457165              | 5.2457165   |
|            | 2.00000    | .38000000             | 1.34142544 | .991 | -3.9157165              | 4.6757165   |

\*. The mean difference is significant at the 0.05 level.

## Homogeneous Subsets

removal

Tukey HSD

| amount  | N | Subset for alpha = 0.05 |            |
|---------|---|-------------------------|------------|
|         |   | 1                       | 2          |
| 1       | 3 | 31.0333333              |            |
| 1.50000 | 3 |                         | 35.5333333 |
| 2.00000 | 3 |                         | 36.1033333 |
| 2.50000 | 3 |                         | 36.4833333 |
| Sig.    |   | 1.000                   | .891       |

Means for groups in homogeneous subsets are displayed.

a. Uses Harmonic Mean Sample Size = 3.000.

**Table S4: Statistical analysis of one-way ANOVA and Post Hoc test on dishwashing performances of the formulated detergent with free and encapsulated enzymes.**

**One-way ANOVA on data for Figure 3A**

**ANOVA**

**D + without enzymes (soft water)**

|                |                 | Sum of Squares | df | Mean Square | F        | Sig. |
|----------------|-----------------|----------------|----|-------------|----------|------|
| Between Groups | (Combined)      | 8090.910       | 3  | 2696.970    | 3739.559 | .000 |
|                | Linear Contrast | 6204.158       | 1  | 6204.158    | 8602.549 | .000 |
|                | Term Deviation  | 1886.752       | 2  | 943.376     | 1308.064 | .000 |
| Within Groups  |                 | 2.885          | 4  | .721        |          |      |
| Total          |                 | 8093.795       | 7  |             |          |      |

**D + free enzymes (soft water)**

|                |                 |          |   |          |          |      |
|----------------|-----------------|----------|---|----------|----------|------|
| Between Groups | (Combined)      | 9730.885 | 3 | 3243.628 | 737.119  | .000 |
|                | Linear Contrast | 7791.137 | 1 | 7791.137 | 1770.547 | .000 |
|                | Term Deviation  | 1939.748 | 2 | 969.874  | 220.405  | .000 |
| Within Groups  |                 | 17.602   | 4 | 4.400    |          |      |
| Total          |                 | 9748.486 | 7 |          |          |      |

**D + encapsulated enzymes (soft water)**

|                |                 |          |   |          |          |      |
|----------------|-----------------|----------|---|----------|----------|------|
| Between Groups | (Combined)      | 9864.935 | 3 | 3288.312 | 1756.108 | .000 |
|                | Linear Contrast | 8688.701 | 1 | 8688.701 | 4640.161 | .000 |
|                | Term Deviation  | 1176.234 | 2 | 588.117  | 314.081  | .000 |
| Within Groups  |                 | 7.490    | 4 | 1.872    |          |      |
| Total          |                 | 9872.425 | 7 |          |          |      |

**Post Hoc test for Figure 3A**

**detergent + without enzymes (soft water)**

Tukey HSD

| temperature | N | Subset for alpha = 0.05 |       |
|-------------|---|-------------------------|-------|
|             |   | 1                       | 2     |
| 21          | 2 | 10.06                   |       |
| 40          | 2 |                         | 83.20 |
| 50          | 2 |                         | 83.30 |
| 60          | 2 |                         | 84.00 |
| Sig.        |   | 1.000                   | .787  |

Means for groups in homogeneous subsets are displayed.

**detergent + free enzymes**

Tukey HSD

| temperature | N | Subset for alpha = 0.05 |         |
|-------------|---|-------------------------|---------|
|             |   | 1                       | 2       |
| 21          | 2 | 10.00                   |         |
| 40          | 2 |                         | 88.1150 |
| 50          | 2 |                         | 90.1600 |
| 60          | 2 |                         | 93.0500 |
| Sig.        |   | 1.000                   | .229    |

Means for groups in homogeneous subsets are displayed.

a. Uses Harmonic Mean Sample Size = 2.000.

**detergent + encapsulated enzymes**

Tukey HSD

| temperature | N | Subset for alpha = 0.05 |         |         |
|-------------|---|-------------------------|---------|---------|
|             |   | 1                       | 2       | 3       |
| 21          | 2 | 11.0000                 |         |         |
| 40          | 2 |                         | 81.0500 |         |
| 50          | 2 |                         |         | 94.2000 |
| 60          | 2 |                         |         | 97.3300 |
| Sig.        |   | 1.000                   | 1.000   | .244    |

Means for groups in homogeneous subsets are displayed.

a. Uses Harmonic Mean Sample Size = 2.000.



### One-way ANOVA on data for Figure 3A

#### ANOVA

|                            |             |           | Sum of Squares | df | Mean Square | F       | Sig. |
|----------------------------|-------------|-----------|----------------|----|-------------|---------|------|
| <b>(21 °c, soft water)</b> |             |           |                |    |             |         |      |
| Between Groups             | (Combined)  |           | 1.258          | 2  | .629        | .495    | .652 |
|                            | Linear Term | Contrast  | .884           | 1  | .884        | .695    | .466 |
|                            |             | Deviation | .375           | 1  | .375        | .295    | .625 |
| Within Groups              |             |           | 3.815          | 3  | 1.272       |         |      |
| Total                      |             |           | 5.073          | 5  |             |         |      |
| <b>(40 °c, soft water)</b> |             |           |                |    |             |         |      |
| Between Groups             | (Combined)  |           | 52.463         | 2  | 26.231      | 14.483  | .029 |
|                            | Linear Term | Contrast  | 4.623          | 1  | 4.623       | 2.552   | .208 |
|                            |             | Deviation | 47.840         | 1  | 47.840      | 26.414  | .014 |
| Within Groups              |             |           | 5.433          | 3  | 1.811       |         |      |
| Total                      |             |           | 57.896         | 5  |             |         |      |
| <b>50 °c, soft water</b>   |             |           |                |    |             |         |      |
| Between Groups             | (Combined)  |           | 121.461        | 2  | 60.730      | 67.901  | .003 |
|                            | Linear Term | Contrast  | 118.810        | 1  | 118.810     | 132.838 | .001 |
|                            |             | Deviation | 2.651          | 1  | 2.651       | 2.964   | .184 |
| Within Groups              |             |           | 2.683          | 3  | .894        |         |      |
| Total                      |             |           | 124.144        | 5  |             |         |      |
| <b>60 °c, soft water</b>   |             |           |                |    |             |         |      |
| Between Groups             | (Combined)  |           | 185.273        | 2  | 92.637      | 17.321  | .023 |
|                            | Linear Term | Contrast  | 177.689        | 1  | 177.689     | 33.223  | .010 |
|                            |             | Deviation | 7.584          | 1  | 7.584       | 1.418   | .319 |
| Within Groups              |             |           | 16.045         | 3  | 5.348       |         |      |

### Post Hoc test for Figure 3A

#### Multiple Comparisons (21 °c, soft water)

Dependent Variable: removal

Tukey HSD

| (I) type | Mean Difference (I-J) | Std. Error | Sig. | 95% Confidence Interval |             |
|----------|-----------------------|------------|------|-------------------------|-------------|
|          |                       |            |      | Lower Bound             | Upper Bound |
| D free   | .06000                | 1.12765    | .998 | -4.6521                 | 4.7721      |
| encap    | -.94000               | 1.12765    | .711 | -5.6521                 | 3.7721      |
| free D   | -.06000               | 1.12765    | .998 | -4.7721                 | 4.6521      |
| encap    | -1.00000              | 1.12765    | .684 | -5.7121                 | 3.7121      |
| encap D  | .94000                | 1.12765    | .711 | -3.7721                 | 5.6521      |
| free     | 1.00000               | 1.12765    | .684 | -3.7121                 | 5.7121      |

**Multiple Comparisons (40 °c, soft water)**

Dependent Variable: removal  
Tukey HSD

| (I) type |       | Mean Difference (I-J) | Std. Error | Sig. | 95% Confidence Interval |             |
|----------|-------|-----------------------|------------|------|-------------------------|-------------|
|          |       |                       |            |      | Lower Bound             | Upper Bound |
| D        | free  | -4.91500              | 1.34579    | .070 | -10.5387                | .7087       |
|          | encap | 2.15000               | 1.34579    | .372 | -3.4737                 | 7.7737      |
| free     | D     | 4.91500               | 1.34579    | .070 | -.7087                  | 10.5387     |
|          | encap | 7.06500*              | 1.34579    | .027 | 1.4413                  | 12.6887     |
| encap    | D     | -2.15000              | 1.34579    | .372 | -7.7737                 | 3.4737      |
|          | free  | -7.06500*             | 1.34579    | .027 | -12.6887                | -1.4413     |

**Multiple Comparisons 50 °c, soft water**

Dependent Variable: removal  
Tukey HSD

| (I) type |       | Mean Difference (I-J) | Std. Error | Sig. | 95% Confidence Interval |             |
|----------|-------|-----------------------|------------|------|-------------------------|-------------|
|          |       |                       |            |      | Lower Bound             | Upper Bound |
| D        | free  | -6.86000*             | .94573     | .011 | -10.8119                | -2.9081     |
|          | encap | -                     | .94573     | .003 | -14.8519                | -6.9481     |
| free     | D     | 10.90000*             | .94573     | .011 | 2.9081                  | 10.8119     |
|          | encap | -4.04000*             | .94573     | .047 | -7.9919                 | -.0881      |
| encap    | D     | 10.90000*             | .94573     | .003 | 6.9481                  | 14.8519     |
|          | free  | 4.04000*              | .94573     | .047 | .0881                   | 7.9919      |

\*. The mean difference is significant at the 0.05 level.

**Multiple Comparisons (60 °c, soft water)**

Dependent Variable: removal  
Tukey HSD

| (I) type |       | Mean Difference (I-J) | Std. Error | Sig. | 95% Confidence Interval |             |
|----------|-------|-----------------------|------------|------|-------------------------|-------------|
|          |       |                       |            |      | Lower Bound             | Upper Bound |
| D        | free  | -9.05000              | 2.31265    | .059 | -18.7139                | .6139       |
|          | encap | -                     | 2.31265    | .021 | -22.9939                | -3.6661     |
| free     | D     | 13.33000*             | 2.31265    | .059 | -.6139                  | 18.7139     |
|          | encap | -4.28000              | 2.31265    | .296 | -13.9439                | 5.3839      |
| encap    | D     | 13.33000*             | 2.31265    | .021 | 3.6661                  | 22.9939     |
|          | free  | 4.28000               | 2.31265    | .296 | -5.3839                 | 13.9439     |

\*. The mean difference is significant at the 0.05 level.

**One-way ANOVA on data of Figure 3B**

**ANOVA**

| <b>21°C , hard water</b> |                 |  | Sum of Squares | df | Mean Square | F     | Sig.  |
|--------------------------|-----------------|--|----------------|----|-------------|-------|-------|
| Between Groups           | (Combined)      |  | .002           | 2  | .001        | .001  | .999  |
|                          | Linear Contrast |  | 0.000          | 1  | 0.000       | 0.000 | 1.000 |
|                          | Term Deviation  |  | .002           | 1  | .002        | .002  | .964  |
| Within Groups            |                 |  | 2.074          | 3  | .691        |       |       |
| Total                    |                 |  | 2.076          | 5  |             |       |       |

| <b>40°C , hard water</b> |                 |  | Sum of Squares | df | Mean Square | F      | Sig. |
|--------------------------|-----------------|--|----------------|----|-------------|--------|------|
| Between Groups           | (Combined)      |  | 815.822        | 2  | 407.911     | 52.448 | .005 |
|                          | Linear Contrast |  | 762.312        | 1  | 762.312     | 98.016 | .002 |
|                          | Term Deviation  |  | 53.510         | 1  | 53.510      | 6.880  | .079 |
| Within Groups            |                 |  | 23.332         | 3  | 7.777       |        |      |
| Total                    |                 |  | 839.154        | 5  |             |        |      |

| <b>50°C , hard water</b> |                 |  | Sum of Squares | df | Mean Square | F      | Sig. |
|--------------------------|-----------------|--|----------------|----|-------------|--------|------|
| Between Groups           | (Combined)      |  | 923.534        | 2  | 461.767     | 17.583 | .022 |
|                          | Linear Contrast |  | 867.214        | 1  | 867.214     | 33.021 | .010 |
|                          | Term Deviation  |  | 56.320         | 1  | 56.320      | 2.145  | .239 |
| Within Groups            |                 |  | 78.787         | 3  | 26.262      |        |      |
| Total                    |                 |  | 1002.321       | 5  |             |        |      |

| <b>60°C , hard water</b> |                 |  | Sum of Squares | df | Mean Square | F       | Sig. |
|--------------------------|-----------------|--|----------------|----|-------------|---------|------|
| Between Groups           | (Combined)      |  | 713.370        | 2  | 356.685     | 103.479 | .002 |
|                          | Linear Contrast |  | 673.403        | 1  | 673.403     | 195.363 | .001 |
|                          | Term Deviation  |  | 39.968         | 1  | 39.968      | 11.595  | .042 |
| Within Groups            |                 |  | 10.341         | 3  | 3.447       |         |      |
| Total                    |                 |  | 723.711        | 5  |             |         |      |

**Post Hoc test for Figure 3B**  
**With detergent**

Tukey HSD

| temperature | N | Subset for alpha = 0.05 |         |
|-------------|---|-------------------------|---------|
|             |   | 1                       | 2       |
| 21.00       | 2 | 3.0000                  |         |
| 40.00       | 2 |                         | 18.7900 |
| 50.00       | 2 |                         | 20.1500 |
| 60.00       | 2 |                         | 24.0500 |
| Sig.        |   | 1.000                   | .067    |

Means for groups in homogeneous subsets are displayed.

**Detergent + Free enzymes (hard water)**

Tukey HSD

| temperature | N | Subset for alpha = 0.05 |         |         |
|-------------|---|-------------------------|---------|---------|
|             |   | 1                       | 2       | 3       |
| 21          | 2 | 3.0350                  |         |         |
| 40          | 2 |                         | 26.2600 |         |
| 50          | 2 |                         |         | 41.3750 |
| 60          | 2 |                         |         | 42.5000 |
| Sig.        |   | 1.000                   | 1.000   | .831    |

Means for groups in homogeneous subsets are displayed.

a. Uses Harmonic Mean Sample Size = 2.000.

**Detergent + Encapsulated enzymes (hard water)**

Tukey HSD

| temperature | N | Subset for alpha = 0.05 |         |
|-------------|---|-------------------------|---------|
|             |   | 1                       | 2       |
| 21          | 2 | 3.0000                  |         |
| 40          | 2 |                         | 46.4000 |
| 50          | 2 |                         | 49.6000 |
| 60          | 2 |                         | 50.0000 |
| Sig.        |   | 1.000                   | .081    |

Means for groups in homogeneous subsets are displayed.

a. Uses Harmonic Mean Sample Size = 2.000.

**Post Hoc test for Figure 3B**

**Multiple Comparisons (40°C , hard water)**

Dependent Variable: removal  
Tukey HSD

| (I) type  |           | Mean Difference (I-J) | Std. Error | Sig. | 95% Confidence Interval |             |
|-----------|-----------|-----------------------|------------|------|-------------------------|-------------|
|           |           |                       |            |      | Lower Bound             | Upper Bound |
| detergent | free      | -7.47000              | 2.78880    | .145 | -19.1236                | 4.1836      |
|           | encap     | -27.61000*            | 2.78880    | .004 | -39.2636                | -15.9564    |
| free      | detergent | 7.47000               | 2.78880    | .145 | -4.1836                 | 19.1236     |
|           | encap     | -20.14000*            | 2.78880    | .011 | -31.7936                | -8.4864     |
| encap     | detergent | 27.61000*             | 2.78880    | .004 | 15.9564                 | 39.2636     |
|           | free      | 20.14000*             | 2.78880    | .011 | 8.4864                  | 31.7936     |

\*. The mean difference is significant at the 0.05 level.

**Multiple Comparisons (50°C , hard water)**

Dependent Variable: removal  
Tukey HSD

| (I) type       |           | Mean Difference (I-J) | Std. Error | Sig. | 95% Confidence Interval |             |
|----------------|-----------|-----------------------|------------|------|-------------------------|-------------|
|                |           |                       |            |      | Lower Bound             | Upper Bound |
| detergent only | free      | -21.22350             | 5.12466    | .051 | -42.6380                | .1910       |
|                | encap     | -29.44850*            | 5.12466    | .021 | -50.8630                | -8.0340     |
| free           | detergent | 21.22350              | 5.12466    | .051 | -.1910                  | 42.6380     |
|                | encap     | -8.22500              | 5.12466    | .369 | -29.6395                | 13.1895     |
| encap          | detergent | 29.44850*             | 5.12466    | .021 | 8.0340                  | 50.8630     |
|                | free      | 8.22500               | 5.12466    | .369 | -13.1895                | 29.6395     |

\*. The mean difference is significant at the 0.05 level.

**Multiple Comparisons (60°C , hard water)**

Dependent Variable: removal  
Tukey HSD

| (I) type  |           | Mean Difference (I-J) | Std. Error | Sig. | 95% Confidence Interval |             |
|-----------|-----------|-----------------------|------------|------|-------------------------|-------------|
|           |           |                       |            |      | Lower Bound             | Upper Bound |
| detergent | free      | -18.45000*            | 1.85659    | .004 | -26.2082                | -10.6918    |
|           | encap     | -25.95000*            | 1.85659    | .002 | -33.7082                | -18.1918    |
| free      | detergent | 18.45000*             | 1.85659    | .004 | 10.6918                 | 26.2082     |
|           | encap     | -7.50000              | 1.85659    | .055 | -15.2582                | .2582       |
| encap     | detergent | 25.95000*             | 1.85659    | .002 | 18.1918                 | 33.7082     |
|           | free      | 7.50000               | 1.85659    | .055 | -.2582                  | 15.2582     |

\*. The mean difference is significant at the 0.05 level.

**Table S5: Statistical analysis of Post Hoc test on effect of detergent concentration on soil removal.**

**Post hoc test within groups for Table 3**

**d + encapsulated enzymes**

Tukey HSD

| detergent | N | Subset for alpha = 0.05 |         |
|-----------|---|-------------------------|---------|
|           |   | 1                       | 2       |
| .00       | 2 | 8.3000                  |         |
| 1.50      | 2 |                         | 49.6000 |
| 1.5       | 2 |                         | 51.0000 |
| 2.50      | 2 |                         | 51.2500 |
| Sig.      |   | 1.000                   | .626    |

Means for groups in homogeneous subsets are displayed.

a. Uses Harmonic Mean Sample Size = 2.000.

**d + free enzymes**

Tukey HSD

| detergent | N | Subset for alpha = 0.05 |         |
|-----------|---|-------------------------|---------|
|           |   | 1                       | 2       |
| .00       | 2 | 8.3000                  |         |
| 1.50      | 2 |                         | 41.3750 |
| 2         | 2 |                         | 44.0500 |
| 2.50      | 2 |                         | 44.6000 |
| Sig.      |   | 1.000                   | .902    |

Means for groups in homogeneous subsets are displayed.

a. Uses Harmonic Mean Sample Size = 2.000.

**Table S6: Statistical analysis of one-way ANOVA and Post Hoc test on effect of washing time on soil removal using the formulated detergent A (contained free enzymes) and B (contained encapsulated enzymes) in hard water (350 ppm CaCO<sub>3</sub>) at 50 °C.**

**One- way ANOVA on data within group for Figure 4**

**ANOVA**

|       |                |                 | Sum of Squares | df | Mean Square | F        | Sig. |
|-------|----------------|-----------------|----------------|----|-------------|----------|------|
| free  | Between Groups | (Combined)      | 5077.050       | 6  | 846.175     | 74.062   | .000 |
|       |                | Linear Contrast | 4094.158       | 1  | 4094.158    | 358.344  | .000 |
|       |                | Term Deviation  | 982.892        | 5  | 196.578     | 17.206   | .001 |
|       | Within Groups  |                 | 79.977         | 7  | 11.425      |          |      |
|       | Total          |                 | 5157.027       | 13 |             |          |      |
| encap | Between Groups | (Combined)      | 3912.960       | 6  | 652.160     | 183.929  | .000 |
|       |                | Linear Contrast | 3702.736       | 1  | 3702.736    | 1044.285 | .000 |
|       |                | Term Deviation  | 210.224        | 5  | 42.045      | 11.858   | .003 |
|       | Within Groups  |                 | 24.820         | 7  | 3.546       |          |      |
|       | Total          |                 | 3937.780       | 13 |             |          |      |

**Post hoc test within group for Figure 4**

**free**

Tukey HSD

| mins | N | Subset for alpha = 0.05 |         |         |         |
|------|---|-------------------------|---------|---------|---------|
|      |   | 1                       | 2       | 3       | 4       |
| 3    | 2 | 41.3750                 |         |         |         |
| 5    | 2 | 45.5850                 |         |         |         |
| 10   | 2 |                         | 63.3500 |         |         |
| 15   | 2 |                         | 76.5000 | 76.5000 |         |
| 30   | 2 |                         |         | 84.0500 | 84.0500 |
| 25   | 2 |                         |         | 88.0000 | 88.0000 |
| 20   | 2 |                         |         |         | 92.7050 |
| Sig. |   | .857                    | .054    | .097    | .265    |

Means for groups in homogeneous subsets are displayed.

a. Uses Harmonic Mean Sample Size = 2.000.

**encap**

Tukey HSD

| mins | N | Subset for alpha = 0.05 |         |         |         |         |
|------|---|-------------------------|---------|---------|---------|---------|
|      |   | 1                       | 2       | 3       | 4       | 5       |
| 3    | 2 | 49.6000                 |         |         |         |         |
| 5    | 2 |                         | 59.0000 |         |         |         |
| 10   | 2 |                         |         | 70.0000 |         |         |
| 15   | 2 |                         |         |         | 79.0000 |         |
| 20   | 2 |                         |         |         |         | 89.0000 |
| 25   | 2 |                         |         |         |         | 95.0000 |
| 30   | 2 |                         |         |         |         | 96.0000 |
| Sig. |   | 1.000                   | 1.000   | 1.000   | 1.000   | .067    |

Means for groups in homogeneous subsets are displayed.

- a. Uses Harmonic Mean Sample Size = 2.000.



**Table S7: Statistical analysis of one-way ANOVA and Post Hoc test on comparison of dishwashing performance of the formulated detergents A (contained free enzymes) and B (contained encapsulated enzymes) with commercial ADD, Finish®.**

**One-way ANOVA on data for Figure 5A & B**

| ANOVA                      |             |                |    |             |         |      |
|----------------------------|-------------|----------------|----|-------------|---------|------|
| <b>Finish (soft water)</b> |             | Sum of Squares | Df | Mean Square | F       | Sig. |
| Between Groups             |             | 4755.594       | 3  | 1585.198    | 279.761 | .000 |
| Within Groups              |             | 22.665         | 4  | 5.666       |         |      |
| Total                      |             | 4778.259       | 7  |             |         |      |
| <b>Finish (hard water)</b> |             |                |    |             |         |      |
| (Combined)                 |             | 2431.735       | 3  | 810.578     | 377.892 | .000 |
| Between Groups             | Linear Term | 2126.216       | 1  | 2126.216    | 991.243 | .000 |
|                            | Deviation   | 305.519        | 2  | 152.759     | 71.217  | .001 |
| Within Groups              |             | 8.580          | 4  | 2.145       |         |      |
| Total                      |             | 2440.315       | 7  |             |         |      |

**Comparison of formulated detergent with Finish ® (soft water)**

**Post hoc test for Figure 5A (21°C)**

**Multiple Comparisons**

Dependent Variable: removal

Tukey HSD (21°c soft)

| (I) type     | (J) type     | Mean Difference (I-J) | Std. Error | Sig. | 95% Confidence Interval |             |
|--------------|--------------|-----------------------|------------|------|-------------------------|-------------|
|              |              |                       |            |      | Lower Bound             | Upper Bound |
| free         | encapsulated | -1.00000              | 2.83373    | .935 | -12.8413                | 10.8413     |
|              | Finish       | -29.20000*            | 2.83373    | .004 | -41.0413                | -17.3587    |
| encapsulated | free         | 1.00000               | 2.83373    | .935 | -10.8413                | 12.8413     |
|              | Finish       | -28.20000*            | 2.83373    | .004 | -40.0413                | -16.3587    |
| Finish       | free         | 29.20000*             | 2.83373    | .004 | 17.3587                 | 41.0413     |
|              | encapsulated | 28.20000*             | 2.83373    | .004 | 16.3587                 | 40.0413     |

\*. The mean difference is significant at the 0.05 level.

**Post hoc test for Figure 5A (40°C)**

**Multiple Comparisons**

Dependent Variable: removal

Tukey HSD (40 °c soft)

| (I) type     | (J) type     | Mean Difference (I-J) | Std. Error | Sig. | 95% Confidence Interval |             |
|--------------|--------------|-----------------------|------------|------|-------------------------|-------------|
|              |              |                       |            |      | Lower Bound             | Upper Bound |
| Free         | encapsulated | 7.06500*              | 1.22113    | .021 | 1.9623                  | 12.1677     |
|              | Finish       | -5.78500*             | 1.22113    | .036 | -10.8877                | -.6823      |
| encapsulated | free         | -7.06500*             | 1.22113    | .021 | -12.1677                | -1.9623     |
|              | Finish       | -12.85000*            | 1.22113    | .004 | -17.9527                | -7.7473     |
| Finish       | free         | 5.78500*              | 1.22113    | .036 | .6823                   | 10.8877     |
|              | encapsulated | 12.85000*             | 1.22113    | .004 | 7.7473                  | 17.9527     |

\*. The mean difference is significant at the 0.05 level.

**Post hoc test for Figure 5A (50°C)**

Dependent Variable: removal

Tukey HSD (50°c soft water)

| (I) type     | (J) type     | Mean Difference (I-J) | Std. Error | Sig. | 95% Confidence Interval |             |
|--------------|--------------|-----------------------|------------|------|-------------------------|-------------|
|              |              |                       |            |      | Lower Bound             | Upper Bound |
| free         | encapsulated | -4.04000*             | .79230     | .029 | -7.3508                 | -.7292      |
|              | Finish       | -4.14000*             | .79230     | .028 | -7.4508                 | -.8292      |
| encapsulated | free         | 4.04000*              | .79230     | .029 | .7292                   | 7.3508      |
|              | Finish       | -.10000               | .79230     | .991 | -3.4108                 | 3.2108      |
| Finish       | free         | 4.14000*              | .79230     | .028 | .8292                   | 7.4508      |
|              | encapsulated | .10000                | .79230     | .991 | -3.2108                 | 3.4108      |

\*. The mean difference is significant at the 0.05 level.

**Post hoc test for Figure 5A (60°C)**

Dependent Variable: removal

Tukey HSD (60°C soft)

| (I) type     | (J) type     | Mean Difference (I-J) | Std. Error | Sig. | 95% Confidence Interval |             |
|--------------|--------------|-----------------------|------------|------|-------------------------|-------------|
|              |              |                       |            |      | Lower Bound             | Upper Bound |
| Free         | encapsulated | -4.28000              | 2.40312    | .315 | -14.3220                | 5.7620      |
|              | Finish       | -4.95000              | 2.40312    | .245 | -14.9920                | 5.0920      |
| encapsulated | free         | 4.28000               | 2.40312    | .315 | -5.7620                 | 14.3220     |
|              | Finish       | -.67000               | 2.40312    | .959 | -10.7120                | 9.3720      |
| Finish       | free         | 4.95000               | 2.40312    | .245 | -5.0920                 | 14.9920     |
|              | encapsulated | .67000                | 2.40312    | .959 | -9.3720                 | 10.7120     |

### Post hoc test for Figure 5B (21°C)

Dependent Variable: removal

Tukey HSD 21 hard

| (I) type     | (J) type     | Mean Difference (I-J) | Std. Error | Sig. | 95% Confidence Interval |             |
|--------------|--------------|-----------------------|------------|------|-------------------------|-------------|
|              |              |                       |            |      | Lower Bound             | Upper Bound |
| free         | encapsulated | .03500                | .84349     | .999 | -3.4897                 | 3.5597      |
|              | Finish       | -17.16500*            | .84349     | .001 | -20.6897                | -13.6403    |
| encapsulated | free         | -.03500               | .84349     | .999 | -3.5597                 | 3.4897      |
|              | Finish       | -17.20000*            | .84349     | .001 | -20.7247                | -13.6753    |
| Finish       | free         | 17.16500*             | .84349     | .001 | 13.6403                 | 20.6897     |
|              | encapsulated | 17.20000*             | .84349     | .001 | 13.6753                 | 20.7247     |

\*. The mean difference is significant at the 0.05 level.

### Post Hoc test for Figure 5B (40°C)

Dependent Variable: removal

Tukey HSD 40 hard

| (I) type     | (J) type     | Mean<br>Difference (I-<br>J) | Std. Error | Sig. | 95% Confidence Interval |             |
|--------------|--------------|------------------------------|------------|------|-------------------------|-------------|
|              |              |                              |            |      | Lower<br>Bound          | Upper Bound |
| free         | encapsulated | -20.14000*                   | 3.03535    | .014 | -32.8239                | -7.4561     |
|              | Finish       | -2.24000                     | 3.03535    | .761 | -14.9239                | 10.4439     |
| encapsulated | free         | 20.14000*                    | 3.03535    | .014 | 7.4561                  | 32.8239     |
|              | Finish       | 17.90000*                    | 3.03535    | .020 | 5.2161                  | 30.5839     |
| Finish       | free         | 2.24000                      | 3.03535    | .761 | -10.4439                | 14.9239     |
|              | encapsulated | -17.90000*                   | 3.03535    | .020 | -30.5839                | -5.2161     |

\*. The mean difference is significant at the 0.05 level.

### Post Hoc test for Figure 5B (60°C)

Dependent Variable: removal

Tukey HSD50 hard

| (I) type     | (J) type     | Mean<br>Difference (I-<br>J) | Std. Error | Sig. | 95% Confidence Interval |                |
|--------------|--------------|------------------------------|------------|------|-------------------------|----------------|
|              |              |                              |            |      | Lower<br>Bound          | Upper<br>Bound |
| free         | encapsulated | -8.22500                     | 5.18913    | .376 | -29.9089                | 13.4589        |
|              | Finish       | -2.62500                     | 5.18913    | .874 | -24.3089                | 19.0589        |
| encapsulated | free         | 8.22500                      | 5.18913    | .376 | -13.4589                | 29.9089        |
|              | Finish       | 5.60000                      | 5.18913    | .587 | -16.0839                | 27.2839        |
| Finish       | free         | 2.62500                      | 5.18913    | .874 | -19.0589                | 24.3089        |
|              | encapsulated | -5.60000                     | 5.18913    | .587 | -27.2839                | 16.0839        |

\*. The mean difference is significant at the 0.05 level.

### Post Hoc test for Figure 5B (60°C)

Dependent Variable: removal

Tukey HSD ( 60 hard)

| (I) type     | (J) type     | Mean<br>Difference<br>(I-J) | Std. Error | Sig. | 95% Confidence<br>Interval |                |
|--------------|--------------|-----------------------------|------------|------|----------------------------|----------------|
|              |              |                             |            |      | Lower<br>Bound             | Upper<br>Bound |
|              |              |                             |            |      | free                       | encapsulated   |
|              | Finish       | -23.50000*                  | 1.22474    | .001 | -28.6179                   | -18.3821       |
| encapsulated | free         | 7.50000*                    | 1.22474    | .018 | 2.3821                     | 12.6179        |
|              | Finish       | -16.00000*                  | 1.22474    | .002 | -21.1179                   | -10.8821       |
| Finish       | free         | 23.50000*                   | 1.22474    | .001 | 18.3821                    | 28.6179        |
|              | encapsulated | 16.00000*                   | 1.22474    | .002 | 10.8821                    | 21.1179        |

\*. The mean difference is significant at the 0.05 level.
